WITHDRAWN ARTICLE

## WITHDRAWN: Curcumin against imiquimod-induced psoriasis of mice through IL-6/STAT3 signaling pathway

*Yibin Zeng; Hongying Zhao; Tong Zhang; Chao Zhang; Yanni He; Lingbo Du; Fuguo Zuo; Wuqing Wang*

*Biosci Rep* (2020) BSR20192842; **DOI:** 10.1042/BSR20192842

The Accepted Manuscript version of this article (published on 18 June 2020) was withdrawn on 2 October 2020 due to concerns over data validity.
